# Supplementary material for: A cognitive perspective on health systems integration: results of a Canadian Delphi study
Source: BMC Health Serv Res. 2014 May 19;14:222. doi: 10.1186/1472-6963-14-222 (PMC4066828; doi:10.1186/1472-6963-14-222)
Supplement: Additional file 3 — Summary of Sub-Group Differences by Respondents’ Level of Integration Experience, Current Workplace and Current Role. [file 1472-6963-14-222-S3.pdf]

### Summary of Key Sub-Group Differences by Respondents' Level of Integration Experience

|                                                        | Survey Item <sup>1</sup>                                    | Micro-Level (Mi, n=21) |      | Meso-Level (Me, n=43) |      | Macro-Level (Ma, n=26) |      |
|--------------------------------------------------------|-------------------------------------------------------------|------------------------|------|-----------------------|------|------------------------|------|
|                                                        |                                                             | Mean                   | SD   | Mean                  | SD   | Mean                   | SD   |
| <i>1<sup>st</sup> Round – all respondents</i>          | Usefulness of concept of “Roles Mental Model” <sup>2*</sup> | 6.14>Me, Ma            | 0.96 | 5.37                  | 1.46 | 5.08                   | 1.55 |
|                                                        | Usefulness of framework for managing integration*           | 5.52>Ma                | 1.63 | 5.07                  | 1.18 | 4.50                   | 1.48 |
|                                                        | Survey Item <sup>1</sup>                                    | Micro-Level (Mi, n=16) |      | Meso-Level (Me, n=32) |      | Macro-Level (Ma, n=20) |      |
|                                                        |                                                             | Mean                   | SD   | Mean                  | SD   | Mean                   | SD   |
| <i>1<sup>st</sup> Round – second round respondents</i> | Usefulness of concept of “Roles Mental Model” <sup>2*</sup> | 6.31>Me, Ma            | 0.87 | 5.31                  | 1.50 | 5.15                   | 1.50 |
|                                                        | Usefulness of framework for managing integration*           | 5.81>Ma                | 1.33 | 5.22                  | 1.29 | 4.66                   | 1.42 |
|                                                        | Comprehensiveness of definition of Strategy Mental Model**  | 5.75>Ma                | 0.86 | 5.44>Ma               | 1.01 | 4.85                   | 0.81 |
|                                                        | Usefulness of concept of “Strategy Mental Model”*           | 5.75>Ma                | 0.93 | 5.19                  | 1.40 | 4.8                    | 1.36 |
|                                                        | Survey Item <sup>1</sup>                                    | Micro-Level (Mi, n=16) |      | Meso-Level (Me, n=32) |      | Macro-Level (Ma, n=20) |      |
|                                                        |                                                             | Mean                   | SD   | Mean                  | SD   | Mean                   | SD   |
| <i>2<sup>nd</sup> Round – all respondents</i>          | Usefulness of the framework for managing integration*       | 6.13>Me                | 0.72 | 5.60                  | 0.84 | 6.10>Me                | 0.97 |

<sup>1</sup> Only survey items for which there are significant differences across sub-groups are listed

<sup>2</sup> Later renamed “Relationships Mental Model”

A greater than (>) sign is used to denote significant group differences

\*p<0.05

\*\*p<0.01

### Summary of Key Sub-Group Differences by Respondents' Current Role

|                                                        | Survey Item <sup>1</sup>                              | Manager/Administrator or Consultant (M, n=53) |      | Clinician/Care Provider or Patient Advocate (C, n=14) |      | Researcher/Academic or Educator (R, n=11) |      | Policymaker (P, n=12) |      |
|--------------------------------------------------------|-------------------------------------------------------|-----------------------------------------------|------|-------------------------------------------------------|------|-------------------------------------------|------|-----------------------|------|
|                                                        |                                                       | Mean                                          | SD   | Mean                                                  | SD   | Mean                                      | SD   | Mean                  | SD   |
| <i>1<sup>st</sup> Round – all respondents</i>          | Usefulness of framework for interpreting integration* | 5.34>R                                        | 1.34 | 5.21                                                  | 0.97 | 4.36                                      | 1.36 | 4.83                  | 1.03 |
|                                                        | Usefulness of framework for planning integration**    | 5.74>C,R                                      | 1.29 | 5.14                                                  | 0.86 | 4.55                                      | 1.63 | 5.17                  | 1.27 |
|                                                        | Usefulness of framework for managing integration*     | 5.19>P                                        | 1.44 | 5.00                                                  | 1.41 | 4.81                                      | 1.60 | 4.42                  | 1.08 |
|                                                        | Usefulness of framework for evaluating integration*   | 5.57>R                                        | 1.40 | 5.21                                                  | 1.05 | 4.55                                      | 1.44 | 5.25                  | 0.97 |
|                                                        | Survey Item <sup>1</sup>                              | Manager/Administrator or Consultant (M, n=41) |      | Clinician/Care Provider or Patient Advocate (C, n=11) |      | Researcher/Academic or Educator (R, n=8)  |      | Policymaker (P, n=8)  |      |
|                                                        |                                                       | Mean                                          | SD   | Mean                                                  | SD   | Mean                                      | SD   | Mean                  | SD   |
| <i>1<sup>st</sup> Round – second round respondents</i> | Usefulness of framework for planning integration*     | 5.93>C,R                                      | 1.21 | 5.09                                                  | 0.94 | 4.63                                      | 1.85 | 5.50                  | 1.20 |
|                                                        | Usefulness of framework for implementing integration* | 5.51>C                                        | 1.53 | 4.64                                                  | 0.92 | 5.25                                      | 1.39 | 5.00                  | 1.20 |
| <i>2<sup>nd</sup> Round – all respondents</i>          | N/A                                                   |                                               |      |                                                       |      |                                           |      |                       |      |

<sup>1</sup> Only survey items for which there are significant differences across sub-groups are listed.

A greater than (>) sign is used to denote significant group differences

\*p<0.05

\*\*p<0.01

### Summary of Key Sub-Group Differences by Respondents' Current Workplace<sup>1, 2</sup>

|                                                        | Survey Item <sup>3</sup>                                          | Coordinating or Advisory Body (CA, n=14) |      | Hospital (H, n=10) |      | Community, Home, Long-Term, Care (C, n=9) |      | Ministry / Government (M, n=7) |      | RHA/DHA or LHIN (R, n=8) |      | Primary Care (P, n=7) |      | Professional Association or College (Pr, n=5) |      |
|--------------------------------------------------------|-------------------------------------------------------------------|------------------------------------------|------|--------------------|------|-------------------------------------------|------|--------------------------------|------|--------------------------|------|-----------------------|------|-----------------------------------------------|------|
|                                                        |                                                                   | Mean                                     | SD   | Mean               | SD   | Mean                                      | SD   | Mean                           | SD   | Mean                     | SD   | Mean                  | SD   | Mean                                          | SD   |
| <i>1<sup>st</sup> Round – all respondents</i>          | N/A                                                               |                                          |      |                    |      |                                           |      |                                |      |                          |      |                       |      |                                               |      |
| <i>1<sup>st</sup> Round – second round respondents</i> | N/A                                                               |                                          |      |                    |      |                                           |      |                                |      |                          |      |                       |      |                                               |      |
| <i>2<sup>nd</sup> Round – all respondents</i>          | Usefulness of concept of “Roles Mental Model” <sup>4</sup>        | 4.64                                     | 1.01 | 5.90<br>>CA        | 0.88 | 5.33<br>>CA                               | 1.00 | 5.29                           | 1.80 | 6.25<br>>CA              | 0.71 | 6.00<br>>CA           | 0.82 | 6.20<br>>CA                                   | 0.84 |
|                                                        | Usefulness of framework for interpreting integration <sup>*</sup> | 5.00                                     | 0.96 | 5.80               | 0.92 | 6.11<br>>M                                | 0.60 | 4.86                           | 1.07 | 5.88<br>>CA<br>>M        | 0.64 | 5.89                  | 0.69 | 6.40<br>>CA<br>>M                             | 0.55 |

<sup>1</sup> “University/Research Institute” is not included in the table because responses from this sub-group were not significantly different from those of any other sub-group

<sup>2</sup> Only sample size for the second round is reported in the table

<sup>3</sup> Only survey items for which there are significant differences across sub-groups are listed

<sup>4</sup> Later renamed “Relationships Mental Model”

A greater than (>) sign is used to denote significant group differences

<sup>\*</sup>p<0.05
